# ***Wolbachia* and host intrinsic reproductive barriers contribute additively to post-mating isolation in spider mites**

Miguel A. Cruz<sup>1</sup>, Sara Magalhães<sup>1,2</sup>, Élio Sucena<sup>2,3</sup>, Flore Zélé<sup>1,2\*</sup>

\*Correspondence: fezele@fc.ul.pt

<sup>1</sup> Centre for Ecology, Evolution and Environmental Changes (cE3c), Faculdade de Ciências da Universidade de Lisboa, Edifício C2, 3º Piso Campo Grande, 1749-016 Lisboa, Portugal

<sup>2</sup> Departamento de Biologia Animal, Faculdade de Ciências da Universidade de Lisboa, Campo Grande, Edifício C2, 1749-016 Lisboa, Portugal

<sup>3</sup> Instituto Gulbenkian de Ciência, Apartado 14, 2781-901 Oeiras, Portugal

## **Abstract**

*Wolbachia* are widespread maternally-inherited bacteria, suggested to play a role in arthropod host speciation through induction of cytoplasmic incompatibility, but this hypothesis remains controversial. However, most studies focus on closely-related populations of single species, failing to consider the variable degrees of intrinsic reproductive isolation between most natural populations. Here, we dissected the interactions between *Wolbachia*-induced and host-associated incompatibilities in the haplodiploid spider mite *Tetranychus urticae*. We assessed their relative contribution to post-mating isolation between three populations of two genetically differentiated colour forms. We found that these two sources of incompatibility act through different mechanisms in an additive fashion. Host-associated incompatibility contributes 1.5 to 2 times more than *Wolbachia*-induced incompatibility, the former through an overproduction of haploid sons and the latter by increasing the embryonic mortality of daughters. Furthermore, regardless of cross direction, we observed near-complete hybrid sterility and complete F2 hybrid breakdown between populations of the two forms, but that *Wolbachia* did not contribute to this outcome. This study identifies the mechanistic independence and additive nature of these two sources of isolation, and suggests that *Wolbachia* could be an important driver of reproductive character displacement in this system, thereby potentially affecting host differentiation and distribution in the field.

## **Keywords**

Reproductive manipulators; hybridization; reproductive isolation; speciation; reproductive interference; haplodiploidy.

## Introduction

1 In the last decades, it has become increasingly clear that speciation is a continuous process  
2 (the "speciation continuum"; Hendry et al. 2000; Powell et al. 2013; Burri et al. 2015; Supple  
3 et al. 2015). Indeed, ongoing hybridization is taxonomically widespread, and ample variation  
4 in the extent and permeability of various reproductive barriers occurs both within and  
5 between species (Pinto et al. 1991; Mallet 2008; Hendry et al. 2009; Nosil et al. 2009).  
6 Moreover, theoretical studies show that stable partial reproductive isolation can be  
7 relatively common (reviewed by Servedio and Hermisson; 2020).

8 Partial reproductive isolation between lineages (*i.e.* differentiated populations or  
9 incipient species) can evolve in both sympatry and allopatry due to divergent (including  
10 disruptive; Rueffler et al. 2006) sexual and/or ecological selection, and/or as a result of  
11 stochastic processes (Schluter 2001; Turelli et al. 2001; Bolnick and Fitzpatrick 2007; Schluter  
12 2009; Maan and Seehausen 2011; Nosil 2012). Additionally, in arthropods, partial (or  
13 complete) reproductive isolation between and within lineages can result from infection by  
14 different cytoplasmically-inherited bacterial reproductive manipulators (Duron et al. 2008;  
15 Engelstädter and Hurst 2009), among which *Wolbachia* is the most widespread (Weinert et  
16 al. 2015). This endosymbiont can induce various phenotypes of reproductive manipulation in  
17 its hosts, including the most common cytoplasmic incompatibility (CI; Werren et al. 2008;  
18 Engelstädter and Hurst 2009). CI is a conditional sterility phenotype resulting in increased  
19 embryonic mortality of offspring from crosses between infected males and uninfected  
20 females (or females harbouring an incompatible strain). Thus, *Wolbachia*-induced CI (wCI)  
21 can lead to substantial barriers to gene flow between individuals with different infection  
22 status, and could act as an agent of speciation (Laven 1959; Werren 1998; Bordenstein et al.  
23 2001; Telschow et al. 2005; Jaenike et al. 2006). However, whether it plays a significant role  
24 in host speciation is still a matter of controversy, mainly because *Wolbachia* can rapidly  
25 invade host populations (*i.e.* most individuals rapidly become infected, thus immune to CI),  
26 and because wCI must produce a sufficient barrier to gene flow to allow nuclear divergence  
27 between populations (Hurst and Schilthuizen 1998; Werren 1998; Weeks et al. 2002;  
28 Bordenstein 2003). Nevertheless, stable infection polymorphisms are often found in natural  
29 populations of many host species (*e.g.* Vavre et al. 2002; Keller et al. 2004; Zhang et al. 2013;  
30 Hamm et al. 2014; Zélé et al. 2018a). Moreover, whereas speciation induced by wCI may

31 require very specific conditions, it could play a significant role in host speciation by  
32 interacting with other (intrinsic) isolation mechanisms.

33 The fact that natural populations of many organisms often display variable degrees of  
34 reproductive isolation (Scopece et al. 2010; Jennings et al. 2011; Corbett-Detig et al. 2013;  
35 Harrison and Larson 2014) offers an excellent opportunity to address the role of wCI in  
36 ongoing speciation processes. Still, only few studies have done this, with very contrasting  
37 results. Indeed, these studies showed either no wCI in interspecific crosses (Maroja et al.  
38 2008; Gazla and Carracedo 2009; Cooper et al. 2017), that wCI caused complete post-mating  
39 isolation between species (Bordenstein et al. 2001), or either a complementarity  
40 (Shoemaker et al. 1999; Dean and Dobson 2004; see also Gebiola et al. 2016 for CI induced  
41 by *Cardinium*), or a synergy (Gotoh et al. 2005) between wCI and host genetic factors in  
42 establishing post-mating isolation. However, in the latter scenarios, *i.e.* when both sources  
43 of incompatibility jointly reduce gene flow between genetically differentiated host  
44 populations and incipient species, whether they have additive or interacting effects, and  
45 precise quantification of their relative contribution to post-mating isolation, have not been  
46 addressed. This is at odds with the insight it would provide to better understanding the exact  
47 contribution of *Wolbachia* to ongoing processes of speciation in arthropods.

48 *Tetranychus* spider mites constitute an excellent system to address the interplay  
49 between symbiont-induced and host intrinsic reproductive incompatibilities. Indeed, they  
50 are arrhenotokous haplodiploids (*i.e.* males arise from unfertilized eggs and females from  
51 fertilized eggs Helle and Bolland 1967), which allows assessing fertilization failure by  
52 measuring sex-ratios. Moreover, variable degrees of reproductive isolation have been found  
53 both between and within species of this genus (*e.g.* Takafuji and Fujimoto 1985; Navajas et  
54 al. 2000; Sato et al. 2015; Clemente et al. 2016; Knecht et al. 2017). This is the case for the  
55 well-studied *Tetranychus urticae*, in which two genetically differentiated colour forms have  
56 recently diverged (Navajas et al. 1998; Hinomoto et al. 2001; Chen et al. 2014; Matsuda et al.  
57 2018). Due to complete reproductive isolation among some populations of the two forms,  
58 they were historically described as separate species (*T. urticae* and *T. cinnabarinus*, for the  
59 'green' and the 'red' form, respectively; Boudreaux 1956; Van de Bund and Helle 1960; Helle  
60 and Van de Bund 1962; Smith 1975). However, subsequent studies reclassified them as semi-  
61 species (Goka et al. 1996) or members of the same species (Dupont 1979; Fry 1989; Auger et  
62 al. 2013), given that many populations of the two forms are almost completely compatible

63 (Keh 1952; Saba 1975; Murtaugh and Wrensch 1978; Dupont 1979; de Boer 1982b,a;  
64 Sugasawa et al. 2002), suggesting that a speciation process is currently ongoing in this  
65 species.

66 Populations of the two forms of *T. urticae* are also often naturally infected with  
67 different *Wolbachia* strains (Gotoh et al. 2003, 2007; Zhang et al. 2016; Zélé et al. 2018a),  
68 which induce variable levels of wCI (Perrot-Minnot et al. 2002; Vala et al. 2002; Gotoh et al.  
69 2007; Xie et al. 2010; Suh et al. 2015; Zélé et al. 2020b). In spider mites, as in some other  
70 haplodiploid species (e.g. Breeuwer and Werren 1990; Vavre et al. 2001), diploid zygotes  
71 arising from incompatible crosses between an infected male and an uninfected female may  
72 survive as haploid males after complete elimination of the paternal set of chromosomes  
73 (Male development - MD-type incompatibility; Vala et al. 2000; Perrot-Minnot et al. 2002;  
74 Gotoh et al. 2003). In most cases, however, fertilized eggs in incompatible crosses fail to  
75 hatch as in diploid species, leading to embryonic mortality of female offspring (Female  
76 mortality - FM-CI type incompatibility; Breeuwer 1997; Perrot-Minnot et al. 2002; Vala et al.  
77 2002; Gotoh et al. 2003, 2007; Xie et al. 2010; Suh et al. 2015; Bing et al. 2019; Zélé et al.  
78 2020b).

79 In this study, we assessed the interplay and the relative contribution of *Wolbachia*-  
80 induced CI (wCI) and host-associated incompatibilities (HI) on post-mating isolation between  
81 three naturally *Wolbachia*-infected populations, two from the red form and one from the  
82 green form of *T. urticae*. We performed all possible crosses between *Wolbachia*-infected and  
83 *Wolbachia*-free populations in a full-factorial design and measured the embryonic and  
84 juvenile mortality of the offspring, as well as the proportion of males and females produced  
85 from each cross, over two generations.

## Methods

### 86 Spider mite populations

87 Three different populations of spider mites, all collected in Portugal and naturally infected  
88 with *Wolbachia*, were used in this study. Two populations, 'Ri1' and 'Ri2', belong to the red  
89 form of *T. urticae* and share the same *ITS2* rDNA and *COI* mtDNA sequences. The third  
90 population, 'Gi', belongs to the green form of *T. urticae* and differs from the former two  
91 populations in both *ITS2* rDNA and *COI* mtDNA (cf. detailed information in Box S1). The

92 *Wolbachia* strains infecting Ri1 and Ri2 are mutually compatible but induce different levels  
93 of cytoplasmic incompatibility despite identical MLST profiles (Zélé et al. 2020b). The  
94 *Wolbachia* strain infecting Gi, however, slightly differs from the former two based on MLST  
95 and whether it induces CI in this population was heretofore unknown. Since field collection  
96 (*cf.* Box S1), these populations were reared in the laboratory under standard conditions  
97 ( $24\pm 2^\circ\text{C}$ , 16/8h L/D) at very high numbers (*ca.* 500-1000 females per population) in insect-  
98 proof cages containing bean plants (*Phaseolus vulgaris*, cv. Contender seedlings obtained  
99 from Germisem, Oliveira do Hospital, Portugal).

100

### 101 **Antibiotic treatments**

102 After collection, subsets of Gi, Ri1 and Ri2 populations were treated with antibiotics to  
103 obtain the corresponding *Wolbachia*-free populations Gu, Ru1 and Ru2. For logistic reasons,  
104 the populations Gu and Ru2 used in each of the two experiments reported here were  
105 created from two different antibiotic treatments. For Experiment 1, Gu was obtained from a  
106 treatment performed in November 2013, and Ru1 and Ru2 from treatments performed in  
107 February 2014. Briefly, 100 Gi and 30 Ri1 or Ri2 adult females were installed in petri dishes  
108 containing bean leaf fragments, placed on cotton soaked in a tetracycline solution (0.1%,  
109 w/v) for three successive generations (Breeuwer 1997; Zélé et al. 2020b). For Experiment 2,  
110 Ru1 came from the previous antibiotic treatment but Gu and Ru2 were obtained from new  
111 treatments performed in September 2016 and January 2017, respectively. In this case, 300  
112 Gi or Ri2 adult females were installed in petri dishes containing fragments of bean leaves  
113 placed on cotton soaked in a rifampicin solution (0.05%, w/v) for one generation (Gotoh et  
114 al. 2005; Zélé et al. 2020a). All antibiotic treatments were performed in the same standard  
115 conditions as population rearing ( $24\pm 2^\circ\text{C}$ , 16/8h L/D). After treatment, *Wolbachia*-free  
116 populations were maintained without antibiotics in the same mass-rearing conditions as the  
117 *Wolbachia*-infected populations for a minimum of three generations to avoid potential side  
118 effects of antibiotics (Ballard and Melvin 2007; Zeh et al. 2012; O'Shea and Singh 2015).  
119 Subsequently, pools of 100 females from each population were checked by multiplex PCR as  
120 described by Zélé et al. (2018b) to confirm their *Wolbachia* infection status before  
121 performing the experiments.

122 **Experiment 1: F1 production and viability**

123 The combined effect of *Wolbachia*- and host-associated incompatibilities (wCI and HI,  
 124 respectively) on offspring production was investigated by performing all crosses between  
 125 *Wolbachia*-infected and uninfected individuals from all populations in a full factorial design.  
 126 These crosses were organized into 5 different categories, each with a different purpose (*cf.*  
 127 Table 1).

**Table 1. Description of the five categories of crosses performed in this study.**

| Category                                                                                                               | Type of crosses                                                                          | Crosses (♀ x ♂)                                                                          |
|------------------------------------------------------------------------------------------------------------------------|------------------------------------------------------------------------------------------|------------------------------------------------------------------------------------------|
| 1 - Controls                                                                                                           | intra-population crosses using ♀ and ♂ with the same infection status                    | Ru1 x Ru1 and Ri1 x Ri1<br>Ru2 x Ru2 and Ri2 x Ri2<br>Gu x Gu and Gi x Gi                |
| 2 – Test for wCI only                                                                                                  | intra-population crosses using uninfected ♀ and infected ♂                               | Ru1 x Ri1<br>Ru2 x Ri2<br>Gu x Gi                                                        |
| 3 – Test for HI only (without <i>Wolbachia</i> )                                                                       | inter-population crosses using uninfected ♀ and uninfected ♂                             | Ru1 x Ru2 or Gu<br>Ru2 x Ru1 or Gu<br>Gu x Ru1 or Ru2                                    |
| 4 – Test for wCI-HI interaction                                                                                        | inter-population crosses using (un)infected ♀ and infected ♂                             | Ru1 or Ri1 x Ri2 or Gi<br>Ru2 or Ri2 x Ri1 or Gi<br>Gu or Gi x Ri1 or Ri2                |
| 5 – Test for HI only (with <i>Wolbachia</i> , to verify that infection itself, in absence of wCI, does not affect HI)* | inter-population crosses using infected ♀ and uninfected ♂ (+ intra-population controls) | Ri1 x Ru2 or Gu<br>Ri2 x Ru1 or Gu<br>Gi x Ru1 or Ru2<br>(Ri1 x Ru1, Ri2 x Ru2, Gi x Gu) |

\*crosses not performed simultaneously with the others in Experiment 1. The corresponding results were thus analysed separately and are presented in the supplementary materials (Table S1; Figures S1 and S2).

128 Ten days prior to the onset of the experiment (day -10), age cohorts were created for  
 129 each infected and uninfected population, by allowing 3\*100 mated females (*i.e.* ‘female  
 130 cohorts’) and 4\*25 quiescent females (*i.e.* ‘male cohorts’) to lay eggs during 3 days on  
 131 detached bean leaves placed on water-soaked cotton. Eight days later (day -2), quiescent  
 132 females with similar age were randomly collected from each female cohort and placed  
 133 separately on bean leaf fragments (*ca.* 9 cm<sup>2</sup>) where they completed their last moult, thus  
 134 becoming virgin adult females. Virgin males used in the experiment were directly obtained  
 135 from the male cohorts. On the first day of the experiment (day 0), 1 virgin female and 1  
 136 virgin male were installed together on 2.5 cm<sup>2</sup> bean leaf discs for 3 days before being

137 discarded (day 3). The number of unhatched eggs was counted 5 days later (day 8), and the  
138 numbers of dead juveniles, adult males and females were counted 12 days later (day 15).

139 The experiment was conducted in a growth chamber with standard conditions  
140 ( $24 \pm 2^\circ\text{C}$ , 60% RH, 16/8 h L/D). All types of crosses were performed simultaneously, each with  
141 50 independent replicates distributed within two experimental blocks performed one day  
142 apart (*i.e.* 25 replicates per block). However, given the high number of possible types of  
143 crosses (*i.e.* 36 combinations) and associated workload, the crosses of category 5 were  
144 performed *ca.* 23 months later with minor differences in the methodology (*cf.* details in Box  
145 S2). Therefore, data obtained with this latter category were analysed separately and are  
146 provided in the supplementary materials (Table S1, Figures S1 and S2).

147 To calculate the overproduction of F1 males in the brood (MD-type incompatibility;  
148 *e.g.* Breeuwer and Werren 1990; Navajas et al. 2000; Vala et al. 2000; Vavre et al. 2001) or  
149 embryonic mortality of fertilized offspring (*i.e.* only females in haplodiploids, hence FM-type  
150 incompatibility; Vavre et al. 2000; Vala et al. 2002; Gotoh et al. 2007; Suh et al. 2015; Zélé et  
151 al. 2020b), we used indexes adapted from Poinso et al (1998; see also Cattell et al. 2018;  
152 Zélé et al. 2020). MD-type incompatibility was computed as the proportion of sons produced  
153 in each cross relative to the control crosses:

$$154 \quad MD_{corr} = \frac{MD_{obs} - CCMD}{1 - CCMD}$$

155 where  $MD_{obs}$  = number of F1 males/total number of eggs, and  $CCMD$  (calculated as  $MD_{obs}$ )  
156 is the mean proportion of F1 males observed in control crosses (*i.e.* between uninfected  
157 individuals of the same maternal population).

158 Similarly, FM-type incompatibility was computed as the proportion of embryonic death of  
159 daughters produced in each cross relative to the control crosses (hence accounting for  
160 variation in background embryonic mortality of both F1 males and females):

$$161 \quad FM_{corr} = \frac{FM_{obs} - CCFM}{1 - CCFM}$$

162 where  $FM_{obs}$  = number of unhatched eggs/[number of unhatched eggs + number of F1  
163 females], and  $CCFM$  (calculated as  $FM_{obs}$ ) is the mean embryonic mortality observed in the  
164 control crosses. To avoid biases arising from very low numbers of F1 females produced in  
165 some inter-population crosses due to MD-type incompatibilities (*cf.* above and results), all  
166 females that produced less than two daughters were removed from statistical analyses of  
167  $FM_{corr}$  (*cf.* final sample sizes in Table S1).

168 Subsequently, to control for potential incompatibilities affecting juvenile survival, we  
169 estimated the proportion of dead juveniles in the brood accounting for variation in  
170 background juvenile mortality (hence including juvenile mortality of both F1 males and  
171 females):

$$172 \quad JM_{corr} = \frac{JM_{obs} - CCJM}{1 - CCJM}$$

173 where  $JM_{obs}$  = number of dead juveniles/total number of eggs, and  $CCJM$  (calculated as  
174  $JM_{obs}$ ) is the mean juvenile mortality observed in control crosses.

175 Finally, as both FM- and MD-type incompatibilities affect the proportion of F1  
176 (hybrid) females, their combined effect was determined by assessing the proportion of F1  
177 females ( $FP$ ) resulting from each type of cross:

$$178 \quad FP = \frac{\text{number of F1 females}}{\text{total number of eggs}}$$

179 Moreover, to determine the interplay between FM- and MD-type incompatibilities on hybrid  
180 production, we predicted the proportion of F1 females that should be produced in crosses  
181 affected by both incompatibilities, assuming that their effects are independent ( $H_0$   
182 hypothesis):

$$183 \quad FP_{pred} = \frac{FP_{md} \times FP_{fm}}{FP_{comp}}$$

184 where  $FP_{comp}$ ,  $FP_{md}$  and  $FP_{fm}$  are the mean proportions of F1 females observed in the  
185 corresponding compatible crosses, in crosses affected only by MD-type incompatibility, and  
186 in crosses affected only by FM-type incompatibility. Thus, this formula assumes that the  
187 decrease in female production due to FM-type incompatibility in crosses already affected by  
188 MD-type incompatibility is the same as that observed between compatible crosses and  
189 crosses affected by FM-type incompatibility only (and inversely for MD-type incompatibility).  
190 Deviations from this prediction indicate that the two types of incompatibility interfere with  
191 each other, that is, they are not independent.

192 To compare, for each cross, observed and predicted values, we used a Goodness-of-fit Test,  
193 with the Pearson goodness-of-fit statistic calculated as follows:

$$194 \quad \chi_{df}^2 = \sum_j \frac{(FP_{obsj} - FP_{pred})^2}{FP_{pred}}$$

195 where  $FP_{obsj}$  is the proportion of F1 females observed in each replicate  $j$ , and  $FP_{pred}$



196 is the predicted proportion of F1 females under the assumption that the null hypothesis is  
197 true. P-values were defined as the proportion of times the observed values were equal or  
198 lower than the predicted one (Fragata et al. 2014).

199

## 200 **Experiment 2: F1 fertility and F2 viability**

201 To assess the fertility of F1 offspring obtained from inter-population crosses and potential  
202 unviability of F2 offspring (*i.e.* hybrid breakdown; de Boer 1982b; Sugawara et al. 2002), all  
203 crosses performed in Experiment 1, except those involving Ru2 and Ri2 (because they  
204 yielded results similar to Ru1 and Ri1), were repeated in panmixia to obtain large numbers of  
205 individuals 13 days prior to the onset of the experiment (day -13). For each cross, 100 virgin  
206 females were placed with 100 males (obtained from age cohorts as described for Experiment  
207 1) on an entire bean leaf to produce F1 offspring of the same age. These offspring were used  
208 separately to test for F1 female fertility and viability of their offspring (test 1 below) and F1  
209 male fertility and viability of their offspring (test 2 below).

210 The experiment was conducted in a growth chamber with standard conditions  
211 ( $24\pm 2^{\circ}\text{C}$ , 16/8 h L/D). In the first test, F1 females from all types of cross were tested  
212 simultaneously within four experimental blocks (with a maximum of 25 females per cross  
213 tested in each block), while in the second test, uninfected and infected F1 males (*i.e.* sons of  
214 uninfected or infected females, respectively, independently of the male mated with these  
215 females) were tested (and thus analysed) separately. Uninfected F1 males were tested  
216 within 3 experimental blocks (with a maximum of 30 males per cross tested in each block);  
217 and infected F1 males within 2 experimental blocks (with a maximum of 24 males per cross  
218 tested in each block). The number of replicates in each test was limited to the number of F1  
219 offspring that could be obtained from the crosses performed in panmixia (*cf.* final sample  
220 sizes in Table S2).

221

### 222 *Test 1: F1 female fertility and F2 viability*

223 Quiescent F1 females were collected from each cross performed in panmixia and installed on  
224  $9\text{ cm}^2$  bean leaf fragments 2 days prior to the beginning of experiment (day -2) to emerge as  
225 adults while remaining virgin. They were then isolated on  $2.5\text{ cm}^2$  bean leaf discs on the first  
226 experimental day (day 0), and allowed to lay eggs for 4 days, after which they were  
227 discarded and the number of eggs laid was counted (day 4). The number of unhatched eggs

228 was counted 5 days later (day 9), and the numbers of dead juveniles and adult males were  
229 counted 12 days later (day 16; as mothers were virgin, they could only produce sons).

230 As F1 female fertility corresponds to their ability to lay at least one egg, and/or a  
231 normal number of eggs (Navajas et al. 2000), we estimated both the proportion of  
232 ovipositing females and the daily oviposition of these females, taking into account their daily  
233 mortality (*i.e.* total number of eggs laid by each female/total number of days each female  
234 was alive). Hybrid breakdown was assessed as male embryonic and juvenile mortality  
235 accounting for variation in background mortality (*i.e.* not related to hybrid breakdown). The  
236 corresponding  $mEM_{corr}$  and  $mJM_{corr}$  indexes were calculated as follows:

$$237 \quad mEM_{corr} = \frac{mEM_{obs} - CCmEM}{1 - CCmEM}$$

238 where  $mEM_{obs}$  = number of unhatched eggs/total number of eggs, and  $CCmEM$  (calculated  
239 as  $mEM_{obs}$ ) is the mean embryonic mortality observed in control crosses (*i.e.* category 1);

$$240 \quad mJM_{corr} = \frac{mJM_{obs} - CCmJM}{1 - CCmJM}$$

241 where  $mJM_{obs}$  = number of dead juveniles/total number of eggs, and  $CCmJM$  (calculated as  
242  $mJM_{obs}$ ) is the mean juvenile mortality observed in control crosses (*i.e.* category 1).

243

#### 244 *Test 2: F1 male fertility and F2 viability*

245 As in haplodiploids sons are hemiclones of their mothers, they inherit a single maternal  
246 chromosome. Thus, in absence of reproductive anomalies they should be fully compatible  
247 with females from their maternal population, whereas the expression of an incompatibility  
248 may indicate that these males are aneuploid. To test this, adult F1 males were collected  
249 from each cross performed in panmixia and placed on 9 cm<sup>2</sup> bean leaf fragments 2 days prior  
250 to the beginning of experiment (day -2) to avoid sperm depletion. On the first experimental  
251 day (day 0), each male was installed with one virgin female (obtained from age cohorts  
252 created as in Experiment 1) from the same population as its mother on a 2.5 cm<sup>2</sup> bean leaf  
253 disc. Four days were given for males to mate and for the females to lay eggs before both  
254 were discarded (day 4). The number of unhatched eggs was counted 5 days later (day 9), and  
255 the numbers of dead juveniles, adult males and adult females were counted 12 days later  
256 (day 16).

257 As F1 male fertility corresponds to their ability to sire at least one daughter and/or a  
258 normal proportion of offspring (*i.e.* F2 females), we estimated both the proportion of males  
259 siring daughter(s) and the sex ratio (SR; here calculated as the ratio of females to males  
260 because haploid males only sire daughters) in the adult offspring of the females they mated  
261 with. Hybrid breakdown was assessed as F2 female embryonic and juvenile mortality  
262 accounting for variation in background mortality. As above,  $fEM_{corr}$  and  $fJM_{corr}$  indexes  
263 were calculated as:

$$264 \quad fEM_{corr} = \frac{fEM_{obs} - CCfEM}{1 - CCfEM}$$

265 where  $fEM_{obs}$  = number of unhatched eggs/[number of unhatched eggs + number of F2  
266 females] and  $CCfEM$  (calculated as  $fEM_{obs}$ ) is the mean embryonic mortality observed in  
267 control crosses (*i.e.* category 1);

$$268 \quad fJM_{corr} = \frac{fJM_{obs} - CCfJM}{1 - CCfJM}$$

269 where  $fJM_{obs}$  = number of dead juveniles/[number of dead juveniles + number of F2  
270 females] and  $CCfJM$  (calculated as  $fJM_{obs}$ ) is the mean juvenile mortality observed in  
271 control crosses (*i.e.* category 1).

272

### 273 **Statistical analyses**

274 Analyses were carried out using the R statistical package (v3.6.1). The different statistical  
275 models built to analyse the data are described in the Supplementary Materials Table S3. The  
276 general procedure to analyse all response variables was as follows: the type of cross was fit  
277 as fixed explanatory variable and block was fit as a random explanatory variable. In addition,  
278 for the analyses of the proportion of fertile F1 females (*i.e.* females that produced at least  
279 one egg) and F1 males (*i.e.* males that sired at least one daughter), their daily mortality over  
280 the 4-day oviposition period was added to the models as it significantly improved their fit.  
281 Proportion data were computed as binary response variables (fertile or sterile F1 females  
282 and males), or using the function `cbind` (*i.e.* female proportion and sex-ratio, respectively),  
283 except for all corrected variables (*e.g.*  $FM_{corr}$ ,  $MD_{corr}$ , etc.), which are continuous variables  
284 bounded between 0 and 1, and for which a “weights” argument was added to the models to  
285 account for the number of observations on which they are based. All data were  
286 subsequently analysed using generalized linear mixed models with the `glmmTMB` procedure

287 (glmmTMB package), which allows using a wide range of error distributions that are not  
288 implemented in the glmer procedure (Brooks et al. 2017). Proportion data were analysed  
289 with a binomial error distribution, or a (zero-inflated) betabinomial error distribution to  
290 account for overdispersed errors, and F1 female daily oviposition in experiment 2 was  
291 analysed using a log-linked Gaussian error distribution. For all analyses, the significance of  
292 the explanatory variable ‘cross’ was established using chi-square tests (Bolker et al. 2009).  
293 When explanatory variables were found to be significant, *a posteriori* contrasts were carried  
294 out between crosses by aggregating factor levels together and testing the fit of the  
295 simplified model using ANOVA (Crawley 2007). Holm-Bonferroni corrections were applied to  
296 account for multiple testing (*i.e.* classical chi-square Wald test for testing the global  
297 hypothesis  $H_0$ ; Holm 1979).

## Results

### 298 **F1 offspring production and viability**

299 Reciprocal crosses performed between naturally *Wolbachia*-infected or *Wolbachia*-free  
300 populations of the red (‘Ri1’ and ‘Ri2’) and green (‘Gi’) form of *T. urticae* allowed testing for  
301 the effects of wCI only, HI only, and the combined effect of both sources of incompatibility  
302 (*cf.* *Methods* and Table 1). Overall, we found no significant differences in juvenile mortality  
303 among crosses (see Figure 1, Tables S1 and S3), but ample variation in embryonic mortality  
304 (*i.e.* proportion of unhatched eggs) and/or in male production, both leading to an important  
305 decrease in female production (Figures 1 and S1). To dissect, in each type of crosses, the  
306 sources of such variation (*i.e.* wCI and/or HI), we determined incompatibilities of the MD-  
307 type (male development; overproduction of males resulting from fertilization failure and/or  
308 paternal genome elimination) and FM-type (female embryonic mortality resulting from  
309 paternal genome fragmentation), and measured the resulting proportion of F1 hybrids (only  
310 females in haplodiploids).

311

#### 312 *Overproduction of males (MD-type incompatibility)*

313 Overall, we found an overproduction of males (*i.e.* higher values of the MD<sub>corr</sub> index; *cf.*  
314 *Methods*) in all inter-population crosses involving females from the green population (*ca.*  
315 46.4 to 64.3%) relative to all other crosses (*ca.* 5.6 to 21.5%; *Main cross effect*:  $\chi^2_{26}=460.70$ ,

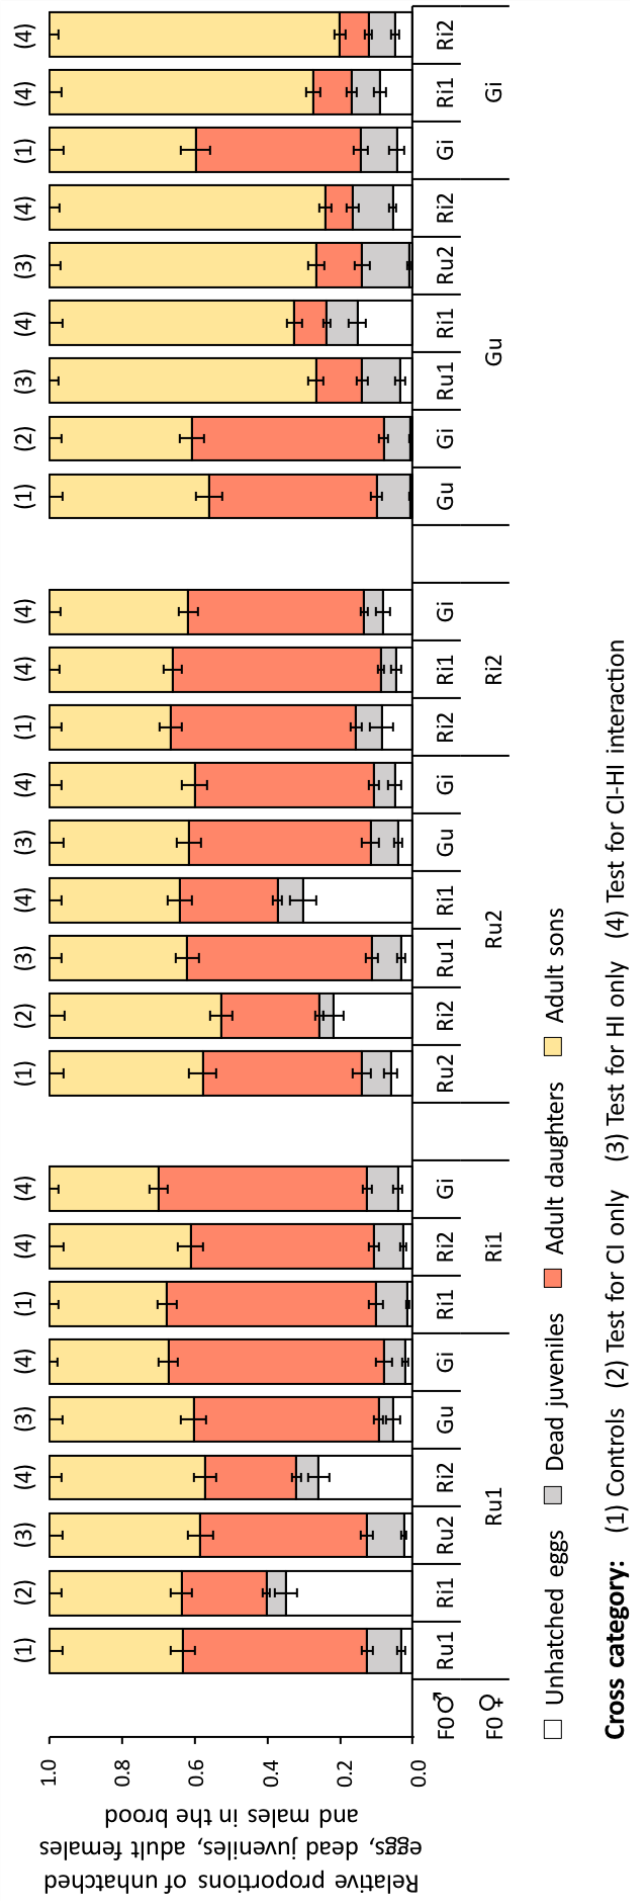

**Figure 1. Summary of the development of *T. urticae* eggs resulting from intra- and inter-population crosses between *Wolbachia*-infected and -uninfected mites.** Bar plots represent mean  $\pm$  s.e. relative proportions of unhatched eggs (i.e. embryonic mortality), dead juveniles (i.e. juvenile mortality), adult daughters and sons for each type of cross. Mothers are displayed at the bottom level of the x-axis and fathers on the top level; Cross categories (1) to (4) are displayed above each bar.

329  $p < 0.0001$ ; model 1.1, Figure 2a for crosses of categories 1 to 4). Moreover, the level of MD-  
330 type incompatibility in these inter-population crosses involving green females was not  
331 affected by *Wolbachia* infection in red males (*Contrasts among all inter-population crosses*  
332 *using Gu or Gi♀*:  $\chi^2_5 = 7.69$ ,  $p = 0.17$ ). In contrast, regardless of *Wolbachia* infection, we found  
333 no overproduction of males in any of the inter-population crosses involving red females  
334 (*Contrasts among all crosses with low MD<sub>corr</sub> including the controls*:  $\chi^2_{20} = 26.11$ ,  $p = 0.16$ ).  
335 Finally, the analysis of crosses involving *Wolbachia*-infected females and uninfected males  
336 (*i.e.* crosses of category 5; Figure S2a) revealed that *Wolbachia* infection in females also does  
337 not affect this pattern, as higher values of MD<sub>corr</sub> were found for inter-population crosses  
338 involving green females (*ca.* 57.9 to 64.5%) as compared to all other crosses (*ca.* 5.9 to  
339 30.3%; *Main cross effect*:  $\chi^2_8 = 174.26$ ,  $p < 0.0001$ ; model 1.2; Table S2).

340

#### 341 *Hybrid (female) embryonic mortality (FM-type incompatibility)*

342 Overall, we found higher levels of female embryonic mortality relative to controls (FM<sub>corr</sub>  
343 index; *cf. Methods*) in all crosses using *Wolbachia*-infected red males, either crossed with  
344 uninfected red females (*i.e.* due to wCI as found by Zélé et al; 2020b), or with green females  
345 independently of their *Wolbachia* infection status (from 22.2 to 42.7% on average; *Main*  
346 *cross effect*:  $\chi^2_{26} = 506.20$ ,  $p < 0.0001$ ; model 1.3; Figure 2b). In addition, there were no  
347 significant differences among these crosses ( $\chi^2_7 = 8.76$ ,  $p = 0.27$ ; despite a tendency for Ri1  
348 males to induce higher levels of FM-type CI than Ri2 males: 35% vs. 29% on average), which  
349 shows that the *Wolbachia* strain infecting the green population did not rescue (even  
350 partially) wCI induced by *Wolbachia*-infection in red males. All other crosses resulted in no  
351 (or low) female embryonic mortality (from 0.2 to 10.5% on average; *Contrasts among all*  
352 *these crosses with low FM<sub>corr</sub>*:  $\chi^2_{16} = 19.99$ ,  $p = 0.22$ ). Thus, these results restrict FM-type  
353 incompatibilities between populations to *Wolbachia* infection in males from the two red  
354 populations, with the same penetrance in inter-population and intra-population crosses.

355

#### 356 *Consequences of MD- and FM-type incompatibilities for hybrid (female) production*

357 As a result of the MD- and FM-type incompatibilities described above, we also found ample  
358 variation in the proportion of females (FP) produced across crosses (*Main cross effect*:  
359  $\chi^2_{26} = 966.45$ ,  $p < 0.0001$ ; model 1.7; Figure 2c). Our contrast analyses further revealed four  
360 statistically different proportions depending on the type of crosses: (1) *ca.* 51% daughters

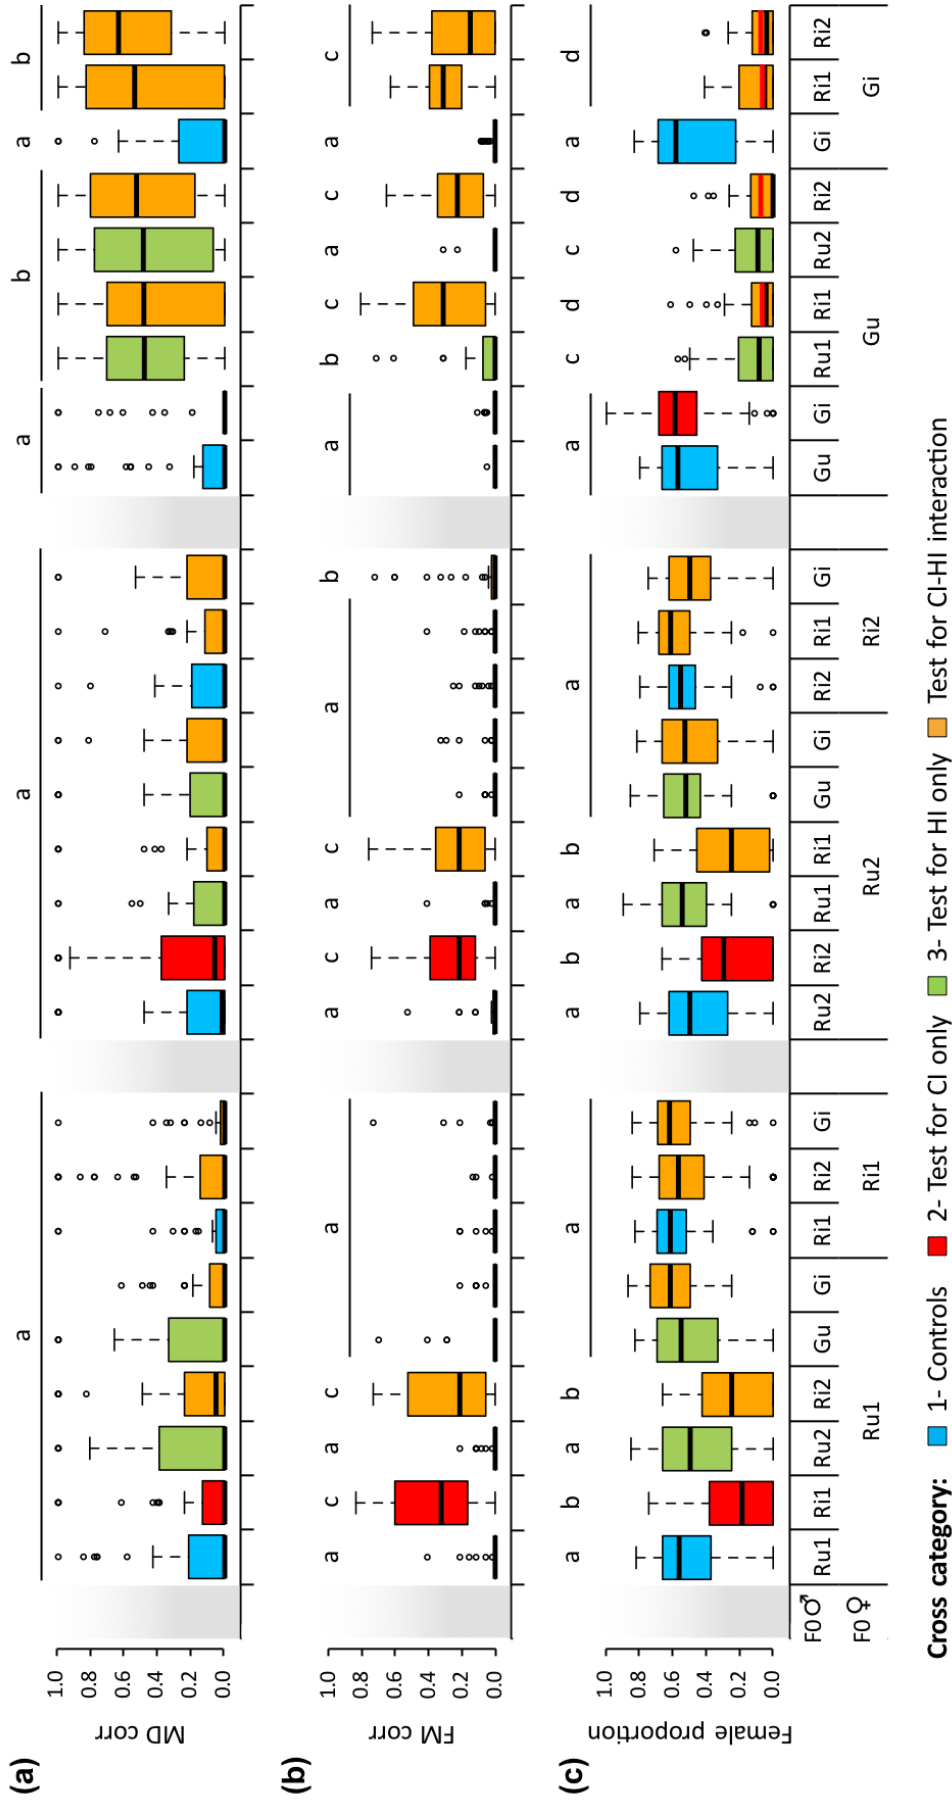

**Figure 2. Overproduction of males, female embryonic mortality, and resulting hybrid production in intra- and inter-population crosses using *Wolbachia*-infected and uninfected mites. (a)** Boxplot of the proportion of unhatched eggs relative to females, accounting for the basal level of this proportion observed in control crosses ( $MD_{corr}$ ). **(b)** Proportion of F1 adult females (i.e. hybrids) in the brood. Horizontal red bars displayed within boxes for crosses affected by both MD- and FM-type incompatibilities indicate predicted values of female proportion ( $FP_{pred}$ ) under the assumption that the two types of incompatibilities have an independent effect on hybrid production. Mothers are displayed on the bottom level of the x-axis and fathers on the top level. Identical or absent superscripts indicate nonsignificant differences at the 5% level among crosses.

361 produced in compatible crosses (*i.e.* unaffected by both incompatibilities; *Contrasts among*  
362 *these crosses*:  $\chi^2_{16}=21.22$ ,  $p=0.17$ ); (2) *ca.* 26% daughters produced in crosses affected by  
363 FM-type incompatibilities only (*Contrasts among these crosses*:  $\chi^2_3=2.98$ ,  $p=0.40$ ; *ca.* 50%  
364 decrease compared to compatible crosses:  $\chi^2_1=187.67$ ,  $p<0.0001$ ); (3) *ca.* 13% daughters  
365 produced in crosses affected by MD-type incompatibilities only (*Contrasts among these*  
366 *crosses*:  $\chi^2_1=0.04$ ,  $p=0.84$ ; *ca.* 75% decrease compared to compatible crosses:  $\chi^2_1=292.02$ ,  
367  $p<0.0001$ ; and *ca.* 76% decrease when using crosses of category 5:  $\chi^2_8=278.23$ ,  $p<0.0001$ ;  
368 model 1.8; Figure S2c); and (4) *ca.* 9% daughters produced in crosses affected by both FM-  
369 and MD-type incompatibilities (*Contrasts among these crosses*:  $\chi^2_3=3.57$ ,  $p=0.31$ ; *ca.* 83%  
370 decrease compared to compatible crosses:  $\chi^2_1=606.40$ ,  $p<0.0001$ ).

371 Both types of incompatibility appeared to have lower consequences on hybrid  
372 production when combined than when acting alone. Indeed, we found around 31% decrease  
373 in hybrid production due to FM-type incompatibility when comparing groups (3) and (4)  
374 ( $\chi^2_1=7.49$ ,  $p=0.03$ ) and close to 65% decrease in hybrid production due to MD-type  
375 incompatibility when comparing groups (2) and (4) ( $\chi^2_1=141.97$ ,  $p<0.0001$ ). However, this  
376 was only a consequence of their cumulative effects. Indeed, we found a perfect fit between  
377 the observed and the predicted proportions of F1 females for crosses affected by both MD-  
378 and FM-type incompatibilities, calculated assuming that both affect hybrid production with  
379 the same strength when acting either alone or combined (Figure 2c; Goodness-of-fit test:  
380  $Gu_{\text{♀}} \times Ri1_{\text{♂}}$ :  $\chi^2_{47}=14.30$ ,  $p=0.58$ ;  $Gu_{\text{♀}} \times Ri2_{\text{♂}}$ :  $\chi^2_{47}=8.46$ ,  $p=0.65$ ;  $Gi_{\text{♀}} \times Ri1_{\text{♂}}$ :  $\chi^2_{47}=13.90$ ,  $p=0.56$ ;  
381 and  $Gi_{\text{♀}} \times Ri2_{\text{♂}}$ :  $\chi^2_{48}=7.37$ ,  $p=0.59$ ). Thus, these results show that MD- and FM-type  
382 incompatibilities are independent, so that their effects are additive with the former  
383 contributing 1.5 to 2 times more than the latter in reducing hybrid production.

384

### 385 **F1 offspring fertility and viability of the F2**

386 To estimate the effects of wCI and HI on the fitness of F1 offspring obtained from all  
387 aforementioned crosses (except those involving Ru2 and Ri2 populations, *cf.* Methods), we  
388 assessed the fertility of virgin F1 females and of F1 males backcrossed to females from their  
389 maternal population, and both embryonic and juvenile mortality of the resulting F2 offspring  
390 (*i.e.* hybrid breakdown; de Boer 1982b; Sugawara et al. 2002).

391



392 *Fertility of F1 females and viability of their offspring (Test 1)*

393 The proportion of fertile F1 females (*i.e.* virgin females that laid at least 1 egg) differed  
394 significantly among crosses ( $\chi^2_{15}=214.26$ ,  $p<0.0001$ ; model 2.1; Figure 3a). Indeed, while the  
395 proportion of fertile F1 females resulting from all intra-population crosses was very high (*ca.*  
396 96% on average; *Contrasts among intra-population crosses*;  $\chi^2_7=8.42$ ,  $p=0.30$ ), more than  
397 99% of the hybrid females resulting from inter-population crosses were unable to lay eggs.  
398 Moreover, although 6 hybrid females (over a total of 760), all resulting from crosses  
399 between males and females with the same *Wolbachia* infection status (either both infected,  
400 or both uninfected), were found to be fertile, they laid very few eggs (average daily  
401 oviposition of  $0.63 \pm 0.15$  compared to  $6.37 \pm 0.09$  for females resulting from intra-  
402 population crosses; *cf.* Table S3), with no significant difference among inter-population  
403 crosses (*Contrasts among inter-population crosses*;  $\chi^2_7=8.59$ ,  $p=0.28$ ).

404 None of the eggs laid by the 6 fertile hybrid females hatched (Table S3), which,  
405 despite the low number of eggs (15 in total), corresponds to full F2 hybrid breakdown. In  
406 contrast, embryonic mortality ( $mEM_{corr}$ ) of eggs laid by F1 females resulting from intra-  
407 population crosses was very low (*ca.* 5%), with only a very small increased mortality (*ca.* 2%)  
408 in the brood of F1 females from the green population when infected by *Wolbachia* (*Main*  
409 *cross effect*:  $\chi^2_7=23.33$ ,  $p=0.001$ ; model 2.3; Figure S3a). Similarly, juvenile mortality ( $mJM_{corr}$ )  
410 in the offspring (*i.e.* all F2 males) of virgin F1 females resulting from intra-population crosses  
411 was very low (below *ca.* 6%), and varied slightly depending on their maternal origin (*Main*  
412 *cross effect*:  $\chi^2_7=18.57$ ,  $p=0.01$ ; model 2.4; Figure S3b). Indeed, the offspring of infected  
413 green F1 females had higher juvenile mortality than the offspring of infected red females  
414 (independently of their grandfather; *Contrasts between Gi and Ri1 females*:  $\chi^2_1=12.53$ ,  
415  $p=0.002$ ), and the offspring of all uninfected F1 females displayed an intermediate mortality  
416 (*Contrasts between Gu-Ru1 and Gi females*:  $\chi^2_1=4.28$ ,  $p=0.17$ ; *Contrasts between Gu-Ru1 and*  
417 *Ri1 females*:  $\chi^2_1=4.49$ ,  $p=0.17$ ).

418

419 *Fertility of F1 males and viability of their offspring (Test 2)*

420 The proportion of fertile F1 males (*i.e.* males siring at least one daughter when backcrossed  
421 with a female from their maternal population) differed significantly among crosses  
422 ( $\chi^2_7=25.58$ ,  $p<0.001$ ; model 2.5.1, and  $\chi^2_7=15.23$ ,  $p=0.03$ ; model 2.5.2, for uninfected and  
423 infected males, respectively), but this difference was mainly attributable to the maternal

424 populations of the F1 males (hence potentially the females mated with F1 males instead of  
 425 the males themselves). Indeed, F1 males mated with (and sons of) green females were less  
 426 fertile than those mated with (and sons of) red females (*ca.* 17.39% and 25.97%, for  
 427 uninfected and infected males, respectively; *cf.* Figure 3b).

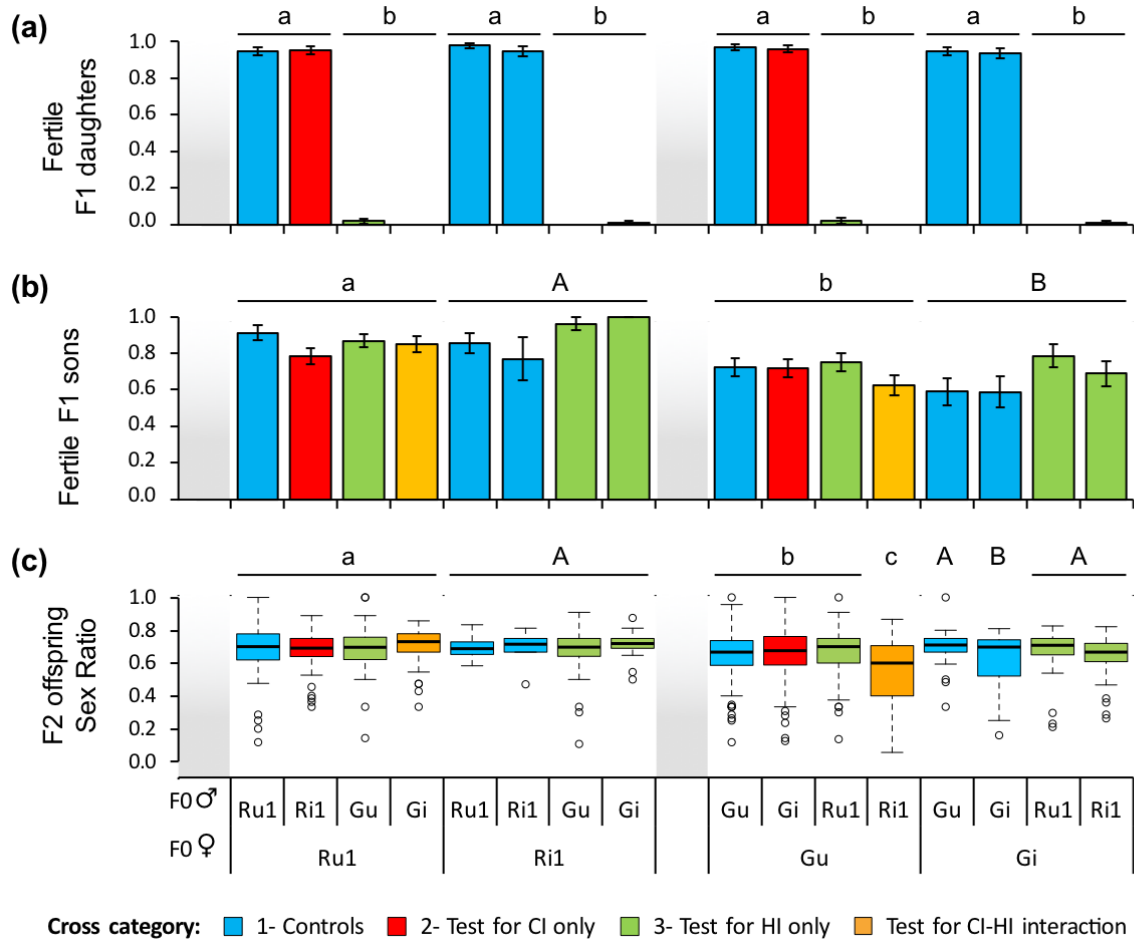

**Figure 3. Proportion of fertile F1 female and male offspring resulting from intra- and inter-population crosses using *Wolbachia*-infected and uninfected mites, and sex-ratio of F2 offspring resulting from backcrosses of F1 males.** Average proportion ( $\pm$  s.e.) of (a) fertile F1 females (*i.e.* proportion of females laying at least 1 egg) and (b) fertile F1 males (*i.e.* proportion of males siring at least 1 daughter when mated with a female from the same population as their mother). (c) Boxplot of sex ratio (daughters to sons) of F2 offspring sired by F1 males. Mothers are displayed on the bottom level of the x-axis and fathers on the top level. Identical or absent superscripts indicate nonsignificant differences at the 5% level among crosses.

428 The maternal population of fertile F1 males also affected the proportion of daughters  
 429 they sired, but only when they were uninfected by *Wolbachia* ( $\chi^2_7=42.10$ ,  $p<0.0001$ ; model  
 430 2.8.1; Figure 3c). In this case, we found that F1 males mated with (and sons of) red females  
 431 sired on average more offspring (*ca.* 69%) than F1 males mated with (and sons of) green

432 females (*ca.* 55% for those mated with red infected males;  $\chi^2_1=32.13$ ,  $p<0.0001$ ; and *ca.* 65%  
433 for those mated with all other males;  $\chi^2_1=8.96$ ,  $p=0.008$ ). We also found some differences in  
434 the sex-ratio of offspring resulting from crosses using infected F1 males ( $\chi^2_7=15.19$ ,  $p=0.03$ ;  
435 model 2.8.2), but this effect was only due to a higher variance (but not median) in the  
436 Gi♀xGi♂ control cross, and no difference was found among all other crosses ( $\chi^2_6=9.93$ ,  
437  $p=0.13$ ; Figure 3c).

438 Finally, both embryonic mortality ( $fEM_{corr}$ ) and juvenile mortality ( $fJM_{corr}$ ) varied  
439 among the offspring of F1 uninfected males (*Main cross effect on  $fEM_{corr}$* :  $\chi^2_7=26.31$ ,  
440  $p<0.001$ ; model 2.6.1, and *on  $fJM_{corr}$* :  $\chi^2_7=22.64$ ,  $p=0.002$ ; model 2.7.1). Indeed, uninfected F1  
441 males mated with (and sons of) green females sired offspring with a higher embryonic  
442 mortality (*ca.* 7% on average) than those mated with, or sons of, red females (*ca.* 4% in  
443 average). However, the variations observed in juvenile mortality cannot necessarily be  
444 explained by the maternal populations of F1 uninfected males (or the females they mated  
445 with), nor by *Wolbachia* infection in the mates of their mother (see Figure S4b). In contrast,  
446 no differences were detected among the offspring of infected F1 males (*Main cross effect on*  
447  *$fEM_{corr}$* :  $\chi^2_7=5.58$ ,  $p=0.59$ ; model 2.6.2, and *on  $fJM_{corr}$* :  $\chi^2_7=11.68$ ,  $p=0.11$ ; model 2.7.2).

## Discussion

448 Using three populations of the two genetically differentiated colour forms of *T. urticae*, each  
449 naturally infected or cured from *Wolbachia*, we assessed the relative contribution of  
450 *Wolbachia*-induced CI (wCI) and of host-associated incompatibilities (HI) to post-mating  
451 isolation. Our results revealed that both sources of incompatibility jointly reduced the  
452 production of F1 hybrid females in the same direction, albeit through different and  
453 independent mechanisms, and with HI contributing up to 2 times more than wCI.  
454 Additionally, we found a *Wolbachia*-independent near-complete F1 hybrid female sterility  
455 and F2 hybrid breakdown in all reciprocal crosses between the green and the red  
456 populations.

457

### Expression of host-associated incompatibilities

459 Crosses performed among uninfected host populations in absence of *Wolbachia* infection  
460 confirmed that the two populations belonging to the red form of *T. urticae* were mutually

461 compatible (Zélé et al. 2020b), but were fully isolated from the green-form population. We  
462 found three different types of post-mating reproductive barriers between these populations:  
463 (1) a sharp and unidirectional reduction in F1 hybrid (female) production, concurrent with an  
464 increased production of F1 males (*i.e.* MD-type incompatibility between females from the  
465 green population and males from the red populations); (2) near-complete F1 hybrid sterility  
466 (> 99%) in all reciprocal crosses between the red and the green population; and (3) full F2  
467 hybrid breakdown, as none of the few eggs produced by virgin hybrid females hatched (*i.e.*  
468 corresponding to F1 hybrid males, as spider mites are haplodiploid).

469 MD-type incompatibilities have already been reported, both between populations  
470 from the two colour forms of *T. urticae* (Murtaugh and Wrensch 1978; Sugasawa et al. 2002;  
471 Lu et al. 2017), as well as among populations of the same colour form (Navajas et al. 2000;  
472 Perrot-Minnot et al. 2004). In haplodiploids, this type of incompatibility can result from  
473 either fertilization failure or haploidization of fertilized F1 eggs, resulting in an excess of F1  
474 males. Partial haploidization of fertilized eggs is unlikely here, as males surviving such defect  
475 would be aneuploid, and thus, should produce fewer daughters, an outcome we did not find  
476 when testing F1 males. Moreover, there is yet no evidence that aneuploid embryos can  
477 actually be viable in spider mites. Conversely, complete haploidization of fertilized eggs is a  
478 plausible explanation, as *Wolbachia* can cause MD-type incompatibility in *T. urticae* (Vala et  
479 al. 2000; Perrot-Minnot et al. 2002; Gotoh et al. 2003), and this outcome was shown to  
480 result from paternal genome elimination following fertilization in haplodiploids (*i.e.* it  
481 restores haploidy and thus leads to the production of viable males; Breeuwer and Werren  
482 1990; Tram et al. 2006). However, because, in spider mites, males come from unfertilized  
483 eggs (*i.e.* arrhenotoky; Helle and Bolland 1967) and not from the elimination of the paternal  
484 genome in fertilized eggs (*i.e.* pseudo-arrhenotoky; Nelson-Rees et al. 1980; Sabelis and  
485 Nagelkerke 1988), fertilization failure due to sperm-egg incompatibility is another possible  
486 explanation for this type of incompatibility between populations (Takafuji and Fujimoto  
487 1985; Perrot-Minnot et al. 2004). Nevertheless, only direct observations of the fertilization  
488 process and early embryogenesis of the offspring in these crosses would provide a test to  
489 this hypothesis.

490 Irrespective of the underlying cytological mechanisms, we found both asymmetric  
491 (MD-type) and symmetric (F1 hybrid sterility and F2 hybrid breakdown) patterns of  
492 reproductive incompatibilities between spider mite populations. In general, asymmetric

493 incompatibilities have been tied to “Bateson-Dobzhansky-Muller incompatibilities” (BDMIs –  
494 negative epistatic interactions between alleles from independently evolving lineages)  
495 between autosomal loci and uniparentally inherited factors (*e.g.* maternal transcripts;  
496 Sawamura 1996; Turelli and Orr 2000; or cytoplasmic elements such as mitochondrial genes;  
497 Burton and Barreto 2012). In contrast, symmetrical patterns of incompatibilities are  
498 generally associated to BDMIs between nuclear genes inherited from both parents (Turelli  
499 and Moyle 2007). This suggests that MD-type incompatibilities are caused by cytonuclear  
500 interactions, whereas hybrid sterility and hybrid breakdown are mainly due to  
501 incompatibilities between nuclear genes. This is in line with some evidence from previous  
502 work using spider mites, albeit several of these studies also highlight a role for cytonuclear  
503 interactions in hybrid sterility and hybrid breakdown (Overmeer and van Zon 1976; de Boer  
504 1982b; Fry 1989; Sugawara et al. 2002; Perrot-Minnot et al. 2004).

505

#### 506 **Expression of *Wolbachia*-induced CI within and among populations**

507 Crosses between *Wolbachia*-infected males and uninfected females within and among  
508 populations showed that the *Wolbachia* strains infecting the two populations of the red  
509 form of *T. urticae* induced imperfect FM-type incompatibility (*ca.* 22 to 43% female  
510 embryonic mortality) and were mutually compatible (as found by Zélé et al; 2020b). Here,  
511 we further showed that wCI had the same penetrance within and among host populations,  
512 including the population from the green form. Conversely, the strain infecting the  
513 population of the green form of *T. urticae* did not induce CI within or between populations,  
514 neither of the FM-type nor of the MD-type. Moreover, this strain did not rescue the CI  
515 induced by the strain infecting the red form populations, in contrast to some other non CI-  
516 inducing *Wolbachia* strains in *T. urticae* (Vala et al. 2002). Thus, taken together, these results  
517 show a unidirectional pattern of wCI, which reduces hybrid production between the  
518 *Wolbachia*-infected red-form populations and the green-form population, regardless of  
519 *Wolbachia* infection in the latter. Finally, we found no evidence for hybrid breakdown (*i.e.*  
520 increased mortality of F2 offspring produced by F1 females escaping wCI) induced by any of  
521 the *Wolbachia* strains, suggesting that such effect is not a common feature in spider mites,  
522 or that it is restricted to strains inducing MD-type incompatibilities (Vala et al. 2000).

523

524 **The combined effects of incompatibility types for hybrid production and gene flow**

525 In some systems, wCI may play a greater role than HI in reducing gene flow between hosts.  
526 For instance, complete post-mating isolation due to bidirectional wCI has been found in  
527 interspecific crosses between the mosquitoes *Aedes polyniensis* and *Ae. riversi* (Dean and  
528 Dobson 2004), and between the parasitoid wasps *Nasonia giraulti* and *N. vitripennis*  
529 (Breeuwer and Werren 1990, 1995), while only partial isolation was found in interspecific  
530 crosses upon *Wolbachia* removal (asymmetrical hybrid production and F2 hybrid  
531 breakdown, respectively). In other systems, however, CI induced by symbionts and host  
532 intrinsic factors can complement each other when acting in opposite directions, as found  
533 between *Encarsia gennaroii* and *Cardinium*-infected *E. suzannae* (Gebiola et al. 2016), or can  
534 act synergistically to reduce gene flow in the same direction. This was found between some  
535 populations of the spider mite *Panonychus mori*, where wCI mainly results in haploidization  
536 of fertilized eggs and can increase existing MD-type incompatibilities between populations  
537 (Gotoh et al. 2005). However, the relative contribution of wCI and HI to post-mating isolation  
538 was not quantified in such cases, nor whether they have additive or interacting effects.

539 In our system, we found that HI and wCI act synergistically to prevent the production  
540 of F1 hybrid offspring in crosses between green females and red males. Moreover, we  
541 showed that they act independently and additively, with HI contributing 1.5 to 2 times more  
542 than wCI to the reduction in hybrid production. However, because all hybrids were either  
543 sterile or produced unviable eggs, *Wolbachia* did not affect gene flow between the red and  
544 green form populations studied here. Nonetheless, these results suggest that wCI may have  
545 an important role in restricting gene flow between populations of *T. urticae* that are only  
546 partially isolated, *i.e.* when hybrids are fertile and hybrid breakdown incomplete (Dupont  
547 1979; Sugasawa et al. 2002). In particular, the effects of wCI may be considerable when MD-  
548 type incompatibilities between hosts are weaker (Murtaugh and Wrensch 1978; Navajas et  
549 al. 2000; Sugasawa et al. 2002), and when the two types of incompatibilities act in opposite  
550 directions (Gebiola et al. 2016).

551

552 **The role of *Wolbachia* on ongoing processes of speciation in spider mites**

553 Partial to complete reproductive incompatibility between populations of different origin is a  
554 common phenomenon in many spider mite species (*e.g.* Van de Bund and Helle 1960;  
555 Navajas et al. 2001; Sato et al. 2015; Knecht et al. 2017), including *T. urticae* (*e.g.* Fry 1989;

556 Navajas et al. 2000; Sugasawa et al. 2002; Perrot-Minnot et al. 2004). This suggests that  
557 incompatibilities can evolve very quickly in spider mites, for instance due to local adaptation  
558 (e.g. host-plant adaptation; Sousa et al. 2019). Possibly, such incompatibilities have evolved  
559 independently of *Wolbachia*, which could have been acquired later on by horizontal transfer.  
560 Such scenario is supported by the absence of an association between mtDNA haplotypes and  
561 *Wolbachia* infection in *T. urticae* (Yu et al. 2011; Z  l   et al. 2018a). However, this does not  
562 rule out the possibility that transient infections can play a role at early stages of host  
563 divergence. Moreover, the fact that wCI and HI affected hybrid production in the same cross  
564 direction is compatible with *Wolbachia* playing a role in early stages of population  
565 divergence. Thus, a potential evolutionary scenario could be that wCI, by reducing the  
566 introgression of nuclear genes from the red populations into the cytoplasm of the green  
567 population, could have initiated the divergence of coadapted cytonuclear complexes  
568 between these populations, thereby further increasing post-mating barriers to gene flow  
569 and subsequent genetic divergence until complete post-mating isolation (Hill 2015), as in the  
570 *Nasonia* wasp complex (Breeuwer and Werren 1990, 1995; Bordenstein et al. 2001; Niehuis  
571 et al. 2008). Although we found only partial unidirectional wCI between our populations,  
572 while complete bidirectional wCI is involved in the evolution of reproductive isolation in  
573 *Nasonia*, several studies have shown that unidirectional wCI causes gene flow reduction  
574 between host populations (reviewed by Engelst  dter and Telschow; 2009), and that  
575 divergence between lineages can occur in the face of ongoing gene flow (Pinho and Hey  
576 2010; Nosil 2012; Muirhead and Presgraves 2016). Nevertheless, studies using population  
577 pairs with variable degrees of post-mating isolation are needed to better understand the  
578 role played by *Wolbachia* in the speciation processes currently ongoing in spider mites.

579

### 580 **Ecological implications of host-associated and *Wolbachia*-induced incompatibilities**

581 Our results show strong reproductive interference (see Gr  ning and Hochkirch 2008;  
582 Burdfield-Steel and Shuker 2011) between the populations from the two forms of *T. urticae*,  
583 which may potentially impact their dynamics by favouring the green form population.  
584 Indeed, green females mated with red males produce less (sterile) hybrid daughters but  
585 more (fertile) sons than red females mated with green males, and this overproduction of  
586 sons may have important consequences for population persistence. Indeed, despite our  
587 finding that F1 green males had a slightly lower fitness than F1 red males (*i.e.* lower fertility

588 and higher embryonic mortality of their daughters), their overproduction should allow green  
589 females to transmit more genes (thereby mitigating the costs of heterospecific matings;  
590 Feldhaar et al. 2008). Moreover, it should also increase, at the next generation, the  
591 probability of conspecific matings (*e.g.* in *Callosobruchus* beetles; Kyogoku and Nishida 2012)  
592 for green females, and of heterospecific matings for red females, which may again favour  
593 the green population.

594 *Wolbachia* may also affect the balance of the interactions between these  
595 populations, both due to the direct effects of infection on host fitness (*i.e.* *Wolbachia* slightly  
596 increases the embryonic and juvenile mortality of F2 sons of green, but not red, F1 females),  
597 but also due to wCI. Indeed, although wCI leads to embryonic mortality of hybrid daughters  
598 of green females, all these daughters are sterile. Conversely, wCI leads to embryonic  
599 mortality of fertile daughters of red females, which may further disadvantage red females in  
600 populations that are polymorphic for *Wolbachia* infection (as often found in spider mites;  
601 Breeuwer and Jacobs 1996; Zhang et al. 2013; Zélé et al. 2018a). Note, however, that the  
602 effect of wCI between partially isolated populations of the two forms (*e.g.* de Boer 1982b;  
603 Sugawara et al. 2002) may lead to different scenarios, as it could also affect fertile hybrid  
604 daughters produced by green females.

605 Such ecological scenarios are likely to occur in natural populations of *T. urticae*, as  
606 incompatible populations (both of the same and of different colour forms) often co-occur in  
607 the field (Helle and Pieterse 1965; Lu et al. 2017), and the populations used in this study  
608 were collected in the same geographical area (*cf.* Box S1). However, these scenarios will also  
609 depend on the strength and the symmetry of pre-mating and post-mating prezygotic  
610 reproductive barriers between populations (Sato et al. 2015, 2018; Gebiola et al. 2017;  
611 Clemente et al. 2018). Indeed, although one study reported no assortative mating between  
612 the colour forms of *T. urticae* (Murtaugh and Wrensch 1978), this may vary between  
613 populations, as found between *T. urticae* and *T. evansi* (Sato et al. 2014; Clemente et al.  
614 2016). In line with this, contrasting results were also found concerning the effect of  
615 *Wolbachia* on spider mite mating behaviour (Vala et al. 2004; Rodrigues et al. 2018). Thus, to  
616 understand the implications of reproductive interference in this system, future studies  
617 should focus on prezygotic isolation between *T. urticae* populations, infected or not by  
618 *Wolbachia*.

619



## 620 **Conclusions**

621 Our results show that host-associated and *Wolbachia*-induced incompatibilities in this  
622 system lead to different outcomes and that both contribute to counter hybridization  
623 between populations of the two *T. urticae* colour forms. Furthermore, these two types of  
624 incompatibility have additive effects in the same direction of crosses, which hints at a  
625 possible role of *Wolbachia*-induced incompatibilities in host population divergence and  
626 subsequent evolution of intrinsic reproductive barriers. Although the level of divergence  
627 between the populations studied here narrows our understanding of the contribution by  
628 *Wolbachia* in this system (because they are either not or fully isolated), our results suggest  
629 that this reproductive manipulator may have a considerable effect between partially isolated  
630 populations and, thus, could play an important role in the processes of speciation currently  
631 ongoing in spider mites. Finally, our results raise important questions about the ecological  
632 consequences of *Wolbachia*-driven reproductive interference in arthropods, and call for  
633 further studies to understand its impact on the dynamics and distribution of natural  
634 populations from the same species, but also from closely-related species.

## **Acknowledgements**

We are grateful to Salomé Clémente and Leonor Rodrigues for their help in collecting data for the first experiment, to Inês Santos for the maintenance of the spider mite populations and the plants, and to Inês Fragata and Fabrice Vavre for useful discussions and suggestions.

## **Authors' contributions**

Experimental conception and design of the first experiment: FZ with discussions with SM. Experimental conception and design of the second experiment: MC, FZ, SM, ES; Acquisition of data, statistical analyses, and writing of the first version of the manuscript: MC, FZ. Subsequent versions were written with input from SM and ES. All authors have approved the final version for publication.

## **Funding**

This work was funded by an FCT-ANR project (FCT-ANR//BIA- EVF/0013/2012) to SM and Isabelle Olivieri and by an ERC Consolidator Grant (COMPCON, GA 725419) to SM. MC was funded through an FCT PhD fellowship (SFRH/BD/136454/2018), and FZ through an FCT Post-Doc fellowship (SFRH/BPD/125020/2016). Funding agencies did not participate in the design or analysis of experiments.

635

## Abbreviations

CI: cytoplasmic incompatibility; wCI: *Wolbachia*-induced cytoplasmic incompatibility; HI: Host-associated incompatibility; EM: Embryonic mortality; FM: Female mortality; MD: Male development; JM: Juvenile mortality; FP: Female proportion over total number of eggs laid; SR: Sex ratio (here ratio of females to males in the offspring).

## References

- Auger, P., A. Migeon, E. A. Ueckermann, L. Tiedt, and M. Navajas. 2013. Evidence for synonymy between *Tetranychus urticae* and *Tetranychus cinnabarinus* (Acari, Prostigmata, Tetranychidae): Review and new data. *Acarologia* 53:383–415.
- Ballard, J. W. O., and R. G. Melvin. 2007. Tetracycline treatment influences mitochondrial metabolism and mtDNA density two generations after treatment in *Drosophila*. *Insect Mol. Biol.* 16:799–802.
- Bing, X. L., Y. J. Lu, C. B. Xia, X. Xia, and X. Y. Hong. 2019. Transcriptome of *Tetranychus urticae* embryos reveals insights into *Wolbachia*-induced cytoplasmic incompatibility. *Insect Mol. Biol.* 29:193–204.
- Bolker, B. M., M. E. Brooks, C. J. Clark, S. W. Geange, J. R. Poulsen, M. H. H. Stevens, and J. S. S. White. 2009. Generalized linear mixed models: a practical guide for ecology and evolution. *Trends Ecol. Evol.* 24:127–135.
- Bolnick, D. I., and B. M. Fitzpatrick. 2007. Sympatric Speciation: Models and Empirical Evidence. *Annu. Rev. Ecol. Evol. Syst.* 38:459–487.
- Bordenstein, S., F. P. O'Hara, and J. H. Werren. 2001. *Wolbachia*-induced incompatibility precedes other hybrid incompatibilities in *Nasonia*. *Nature* 409:707–710.
- Bordenstein, S. R. 2003. Symbiosis and the origin of Species. Pp. 283–304 in K. Bourtzis and T. Miller, eds. *Insect symbiosis*. CRC Press, Boca Raton.
- Boudreaux, H. B. 1956. Revision of the Two-Spotted Spider Mite (Acarina, Tetranychidae) Complex, *Tetranychus telarius* (Linnaeus). *Ann. Entomol. Soc. Am.* 49:43–48.
- Breeuwer, J. A. J. 1997. *Wolbachia* and cytoplasmic incompatibility in the spider mites *Tetranychus urticae* and *T. turkestanii*. *Heredity* 79:41–47.
- Breeuwer, J. A. J., and G. Jacobs. 1996. *Wolbachia*: Intracellular manipulators of mite reproduction. *Exp. Appl. Acarol.* 20:421–434.
- Breeuwer, J. A. J., and J. H. Werren. 1995. Hybrid Breakdown Between Two Haplodiploid Species: the Role of Nuclear and Cytoplasmic Genes. *Evolution* 49:705–717.
- Breeuwer, J. A. J., and J. H. Werren. 1990. Microorganisms associated with chromosome destruction and reproductive isolation between two insect species. *Nature* 346:558–560.
- Brooks, M. E., K. Kristensen, K. J. van Benthem, A. Magnusson, C. W. Berg, A. Nielsen, H. J. Skaug, M. Mächler, and B. M. Bolker. 2017. glmmTMB balances speed and flexibility among packages for zero-inflated generalized linear mixed modeling. *R J.* 9:378–400.
- Burdfield-Steel, E. R., and D. M. Shuker. 2011. Reproductive interference. *Curr. Biol.* 21:R450–R451.
- Burri, R., A. Nater, T. Kawakami, C. F. Mugal, P. I. Olason, L. Smeds, A. Suh, L. Dutoit, S. Bureš, L. Z. Garamszegi, S. Hogner, J. Moreno, A. Qvarnström, M. Ružić, S. A. Sæther, G. P. Sætre, J. Török, and H. Ellegren. 2015. Linked selection and recombination rate variation drive the evolution of the genomic landscape of differentiation across the

- speciation continuum of *Ficedula* flycatchers. *Genome Res.* 25:1656–1665.
- Burton, R. S., and F. S. Barreto. 2012. A disproportionate role for mtDNA in Dobzhansky-Muller incompatibilities? *Mol. Ecol.* 21:4942–4957.
- Cattel, J., K. Nikolouli, T. Andrieux, J. Martinez, F. Jiggins, S. Charlat, F. Vavre, D. Lejon, P. Gibert, and L. Mouton. 2018. Back and forth *Wolbachia* transfers reveal efficient strains to control spotted wing drosophila populations. *J. Appl. Ecol.* 55:2408–2418.
- Chen, D.-S., P.-Y. Jin, K.-J. Zhang, X.-L. Ding, S.-X. Yang, J.-F. Ju, J.-Y. Zhao, and X.-Y. Hong. 2014. The Complete Mitochondrial Genomes of Six Species of *Tetranychus* Provide Insights into the Phylogeny and Evolution of Spider Mites. *PLoS One* 9:e110625.
- Clemente, S. H., L. R. Rodrigues, R. Ponce, S. A. M. Varela, and S. Magalhães. 2016. Incomplete species recognition entails few costs in spider mites, despite first-male precedence. *Behav. Ecol. Sociobiol.* 70:1161–1170.
- Clemente, S. H., I. Santos, R. Ponce, L. R. Rodrigues, S. A. M. Varela, and S. Magalhães. 2018. Despite reproductive interference, the net outcome of reproductive interactions among spider mite species is not necessarily costly. *Behav. Ecol.* 29:321–327.
- Cooper, B. S., P. S. Ginsberg, M. Turelli, and D. R. Matute. 2017. *Wolbachia* in the *Drosophila yakuba* complex: Pervasive frequency variation and weak cytoplasmic incompatibility, but no apparent effect on reproductive isolation. *Genetics* 205:333–351.
- Corbett-Detig, R. B., J. Zhou, A. G. Clark, D. L. Hartl, and J. F. Ayroles. 2013. Genetic incompatibilities are widespread within species. *Nature* 504:135–137.
- Crawley, M. J. 2007. *The R Book*. John Wiley & Sons, Ltd, Chichester.
- de Boer, R. 1982a. Laboratory Hybridization Between Semi-Incompatible Races of the Arrhenotokous Spider Mite *Tetranychus urticae* Koch (Acari: Tetranychidae). *Evolution* 36:553–560.
- de Boer, R. 1982b. Partial hybrid sterility between strains of the arrhenotokous spider mite, *Tetranychus urticae* complex (Acari, Tetranychidae). *Genetica* 58:23–33.
- Dean, J. L., and S. L. Dobson. 2004. Characterization of *Wolbachia* infections and interspecific crosses of *Aedes (Stegomyia) polynesiensis* and *Ae. (Stegomyia) riversi* (Diptera: Culicidae). *J. Med. Entomol.* 41:894–900.
- Dupont, L. M. 1979. On gene flow between *Tetranychus urticae* Koch, 1836 and *Tetranychus cinnabarinus* (Boisduval) Boudreaux, 1956 (Acari: Tetranychidae): Synonymy between the two species. *Entomol. Exp. Appl.* 25:297–303.
- Duron, O., D. Bouchon, S. S. S. Boutin, L. Bellamy, L. Zhou, J. Engelstädter, and G. D. Hurst. 2008. The diversity of reproductive parasites among arthropods: *Wolbachia* do not walk alone. *BMC Biol.* 6:27.
- Engelstädter, J., and G. D. D. Hurst. 2009. The Ecology and Evolution of Microbes that Manipulate Host Reproduction. *Annu. Rev. Ecol. Evol. Syst.* 40:127–149.
- Engelstädter, J., and A. Telschow. 2009. Cytoplasmic incompatibility and host population structure. *Heredity* 103:196–207.
- Feldhaar, H., S. Foitzik, and J. Heinze. 2008. Lifelong commitment to the wrong partner: Hybridization in ants. *Philos. Trans. R. Soc. B Biol. Sci.* 363:2891–2899.
- Fragata, I., M. Lopes-Cunha, M. Bárbaro, B. Kellen, M. Lima, M. A. Santos, G. S. Faria, M. Santos, M. Matos, and P. Simões. 2014. How much can history constrain adaptive evolution? A real-time evolutionary approach of inversion polymorphisms in *Drosophila subobscura*. *J. Evol. Biol.* 27:2727–2738.
- Fry, J. D. 1989. Nuclear-nuclear and nuclear-cytoplasmic interactions contribute to the reproductive incompatibility between two strains of the twospotted spider mite.

- Entomol. Exp. Appl. 50:97–100.
- Gazla, I. N., and M. C. Carracedo. 2009. Effect of intracellular *Wolbachia* on interspecific crosses between *Drosophila melanogaster* and *Drosophila simulans*. *Genet. Mol. Res.* 8:861–869.
- Gebiola, M., S. E. Kelly, P. Hammerstein, M. Giorgini, and M. S. Hunter. 2016. “Darwin’s corollary” and cytoplasmic incompatibility induced by *Cardinium* may contribute to speciation in *Encarsia* wasps (Hymenoptera: Aphelinidae). *Evolution* 70:2447–2458.
- Gebiola, M., S. E. Kelly, L. Velten, R. Zug, P. Hammerstein, M. Giorgini, and M. S. Hunter. 2017. Reproductive interference and fecundity affect competitive interactions of sibling species with low mating barriers: Experimental and theoretical evidence. *Heredity* 119:438–446.
- Goka, K., A. Takafuji, S. Toda, T. Hamamura, M. Osakabe, and S. Komazaki. 1996. Genetic distinctness between two forms of *Tetranychus urticae* Koch (Acari: Tetranychidae) detected by electrophoresis. *Exp. Appl. Acarol.* 20:683–693.
- Gotoh, T., H. Noda, T. Fujita, K. Iwadate, Y. Higo, S. Saito, and S. Ohtsuka. 2005. *Wolbachia* and nuclear-nuclear interactions contribute to reproductive incompatibility in the spider mite *Panonychus mori* (Acari: Tetranychidae). *Heredity* 94:237–246.
- Gotoh, T., H. Noda, and X. Y. Hong. 2003. *Wolbachia* distribution and cytoplasmic incompatibility based on a survey of 42 spider mite species (Acari: Tetranychidae) in Japan. *Heredity* 91:208–216.
- Gotoh, T., J. Sugawara, H. Noda, and Y. Kitashima. 2007. *Wolbachia*-induced cytoplasmic incompatibility in Japanese populations of *Tetranychus urticae* (Acari: Tetranychidae). *Exp. Appl. Acarol.* 42:1–16.
- Gröning, J., and A. Hochkirch. 2008. Reproductive Interference Between Animal Species. *Q. Rev. Biol.* 83:257–282.
- Hamm, C. A., D. J. Begun, A. Vo, C. C. R. Smith, P. Saelao, A. O. Shaver, J. Jaenike, and M. Turelli. 2014. *Wolbachia* do not live by reproductive manipulation alone: Infection polymorphism in *Drosophila suzukii* and *D. subpulchrella*. *Mol. Ecol.* 23:4871–4885.
- Harrison, R. G., and E. L. Larson. 2014. Hybridization, introgression, and the nature of species boundaries. *J. Hered.* 105:795–809.
- Helle, W., and H. R. Bolland. 1967. Karyotypes and sex-determination in spider mites (Tetranychidae). *Genetica* 38:43–53.
- Helle, W., and A. H. Pieterse. 1965. Genetic affinities between adjacent populations of spider mites (*Tetranychus urticae* Koch). *Entomol. Exp. Appl.* 8:305–308.
- Helle, W., and C. F. Van de Bund. 1962. Crossbreeding experiments with some species of the *Tetranychus urticae* group. *Entomol. Exp. Appl.* 5:159–165.
- Hendry, A. P., D. I. Bolnick, D. Berner, and C. L. Peichel. 2009. Along the speciation continuum in sticklebacks. *J. Fish Biol.* 75:2000–2036.
- Hendry, A. P., S. M. Vamosi, S. J. Latham, J. C. Heilbut, and T. Day. 2000. Questioning species realities. *Conserv. Genet.* 1:67–76.
- Hill, G. E. 2015. Mitonuclear ecology. *Mol. Biol. Evol.* 32:1917–1927.
- Hinomoto, N., M. Osakabe, T. Gotoh, and A. Takafuji. 2001. Phylogenetic analysis of green and red forms of the two-spotted spider mite, *Tetranychus urticae* Koch (Acari: Tetranychidae), in Japan, based on mitochondrial cytochrome oxidase subunit I sequences. *Appl. Entomol. Zool.* 36:459–464.
- Holm, S. 1979. A Simple Sequentially Rejective Multiple Test Procedure. *Scand. J. Stat.* 6:65–70.

- Hurst, G. D. D., and M. Schilthuizen. 1998. Selfish genetic elements and speciation. *Heredity* 80:2–8.
- Jaenike, J., K. A. Dyer, C. Cornish, and M. S. Minhas. 2006. Asymmetrical reinforcement and *Wolbachia* infection in *Drosophila*. *PLoS Biol.* 4:1852–1862.
- Jennings, J. H., D. Mazzi, M. G. Ritchie, and A. Hoikkala. 2011. Sexual and postmating reproductive isolation between allopatric *Drosophila montana* populations suggest speciation potential. *BMC Evol. Biol.* 11:68.
- Keh, B. 1952. Mating Experiments with the Two-spotted Spider Mite Complex. *J. Econ. Entomol.* 45:308–312.
- Keller, G. P., D. M. Windsor, J. M. Saucedo, and J. H. Werren. 2004. Reproductive effects and geographical distributions of two *Wolbachia* strains infecting the Neotropical beetle, *Chelymorpha alternans* Boh. (Chrysomelidae, Cassidinae). *Mol. Ecol.* 13:2405–2420.
- Knegt, B., T. Potter, N. A. Pearson, Y. Sato, H. Staudacher, B. C. J. Schimmel, E. T. Kiers, and M. Egas. 2017. Detection of genetic incompatibilities in non-model systems using simple genetic markers: hybrid breakdown in the haplodiploid spider mite *Tetranychus evansi*. *Heredity* 118:311–321.
- Kyogoku, D., and T. Nishida. 2012. The presence of heterospecific males causes an Allee effect. *Popul. Ecol.* 54:391–395.
- Laven, H. 1959. Speciation by Cytoplasmic Isolation in the *Culex pipiens*-Complex. *Cold Spring Harb. Symp. Quant. Biol.* 24:166–173.
- Lu, W., M. Wang, Z. Xu, G. Shen, P. Wei, M. Li, W. Reid, and L. He. 2017. Adaptation of acaricide stress facilitates *Tetranychus urticae* expanding against *Tetranychus cinnabarinus* in China. *Ecol. Evol.* 7:1233–1249.
- Maan, M. E., and O. Seehausen. 2011. Ecology, sexual selection and speciation. *Ecol. Lett.* 14:591–602.
- Mallet, J. 2008. Hybridization, ecological races and the nature of species: Empirical evidence for the ease of speciation. *Philos. Trans. R. Soc. B Biol. Sci.* 363:2971–2986.
- Maroja, L. S., M. E. Clark, and R. G. Harrison. 2008. *Wolbachia* plays no role in the one-way reproductive incompatibility between the hybridizing field crickets *Gryllus firmus* and *G. pennsylvanicus*. *Heredity* 101:435–444.
- Matsuda, T., T. Kozaki, K. Ishii, and T. Gotoh. 2018. Phylogeny of the spider mite sub-family Tetranychinae (Acari: Tetranychidae) inferred from RNA-Seq data. *PLoS One* 13:e0203136.
- Muirhead, C. A., and D. C. Presgraves. 2016. Hybrid incompatibilities, local adaptation, and the genomic distribution of natural introgression between species. *Am. Nat.* 187:249–261.
- Murtaugh, M. P., and D. L. Wrench. 1978. Interspecific competition and hybridization between twospotted and carmine spider mites. *Ann. Entomol. Soc. Am.* 71:862–864.
- Navajas, M., J. Gutierrez, M. Williams, and T. Gotoh. 2001. Synonymy between two spider mite species, *Tetranychus kanzawai* and *T. hydrangeae* (Acari: Tetranychidae), shown by ribosomal ITS2 sequences and cross-breeding experiments. *Bull. Entomol. Res.* 91:117–123.
- Navajas, M., J. Lagnel, J. Gutierrez, and P. Boursot. 1998. Species-wide homogeneity of nuclear ribosomal ITS2 sequences in the spider mite *Tetranychus urticae* contrasts with extensive mitochondrial COI polymorphism. *Heredity* 80:742–752.
- Navajas, M., A. Tsagkarakou, J. Lagnel, and M. J. Perrot-Minnot. 2000. Genetic differentiation in *Tetranychus urticae* (Acari: Tetranychidae): polymorphism, host races or sibling

- species? *Exp. Appl. Acarol.* 24:365–376.
- Nelson-Rees, W. A., M. A. Hoy, and R. T. Roush. 1980. Heterochromatinization, chromatin elimination and haploidization in the parahaploid mite *Metaseiulus occidentalis* (Nesbitt) (Acarina: Phytoseiidae). *Chromosoma* 77:263–276.
- Niehuis, O., A. K. Judson, and J. Gadau. 2008. Cytonuclear genic incompatibilities cause increased mortality in male F2 hybrids of *Nasonia giraulti* and *N. vitripennis*. *Genetics* 178:413–426.
- Nosil, P. 2012. *Ecological speciation*. Oxford University Press Inc, Oxford.
- Nosil, P., L. J. Harmon, and O. Seehausen. 2009. Ecological explanations for (incomplete) speciation. *Trends Ecol. Evol.* 24:145–156.
- O’Shea, K. L., and N. D. Singh. 2015. Tetracycline-exposed *Drosophila melanogaster* males produce fewer offspring but a relative excess of sons. *Ecol. Evol.* 5:3130–3139.
- Overmeer, W. P. J., and A. Q. van Zon. 1976. Partial reproductive incompatibility between populations of spider mites (Acarina: Tetranychidae). *Entomol. Exp. Appl.* 20:225–236.
- Perrot-Minnot, M. J., B. Cheval, A. Migeon, and M. Navajas. 2002. Contrasting effects of *Wolbachia* on cytoplasmic incompatibility and fecundity in the haplodiploid mite *Tetranychus urticae*. *J. Evol. Biol.* 15:808–817.
- Perrot-Minnot, M. J., A. Migeon, and M. Navajas. 2004. Intergenomic interactions affect female reproduction: Evidence from introgression and inbreeding depression in a haplodiploid mite. *Heredity* 93:551–558.
- Pinho, C., and J. Hey. 2010. Divergence with Gene Flow: Models and Data. *Annu. Rev. Ecol. Evol. Syst.* 41:215–230.
- Pinto, J. D., R. Stouthamer, G. R. Platner, and E. R. Oatman. 1991. Variation in Reproductive Compatibility in *Trichogramma* and Its Taxonomic Significance (Hymenoptera: Trichogrammatidae). *Ann. Entomol. Soc. Am.* 84:37–46.
- Poinsot, D., K. Bourtzis, G. Markakis, C. Savakis, and H. Merçot. 1998. *Wolbachia* transfer from *Drosophila melanogaster* into *D. simulans*: Host effect and cytoplasmic incompatibility relationships. *Genetics* 150:227–237.
- Powell, T. H. Q., G. R. Hood, M. O. Murphy, J. S. Heilveil, S. H. Berlocher, P. Nosil, and J. L. Feder. 2013. Genetic divergence along the speciation continuum: the transition from host race to species in *Rhagoletis* (Diptera: Tephritidae). *Evolution* 67:2561–2576.
- Rodrigues, L. R., F. Zélé, I. Santos, and S. Magalhães. 2018. Environments with a high probability of incompatible crosses do not select for mate avoidance in spider mites. *bioRxiv* 395301.
- Rueffler, C., T. J. M. Van Dooren, O. Leimar, and P. A. Abrams. 2006. Disruptive selection and then what? *Trends Ecol. Evol.* 21:238–245.
- Saba, F. 1975. An analysis of the Tetranychid complexes in the Mediterranean area. *J. Appl. Entomol.* 79:384–389.
- Sabelis, M. W., and C. J. Nagelkerke. 1988. Evolution of Pseudo-Arrhenotoky. *Exp. Appl. Acarol.* 4:301–318.
- Sato, Y., J. M. Alba, and M. W. Sabelis. 2014. Testing for reproductive interference in the population dynamics of two congeneric species of herbivorous mites. *Heredity* 113:495–502.
- Sato, Y., J. A. J. Breeuwer, M. Egas, and M. W. Sabelis. 2015. Incomplete premating and postmating reproductive barriers between two parapatric populations of a social spider mite. *Exp. Appl. Acarol.* 65:277–291.
- Sato, Y., H. Sakamoto, T. Gotoh, Y. Saito, J. T. Chao, M. Egas, and A. Mochizuki. 2018.

- Patterns of reproductive isolation in a haplodiploid – strong post-mating, prezygotic barriers among three forms of a social spider mite. *J. Evol. Biol.* 31:866–881.
- Sawamura, K. 1996. Maternal effect as a cause of exceptions for Haldane’s rule. *Genetics* 143:609–611.
- Schluter, D. 2001. Ecology and the origin of species. *Trends Ecol. Evol.* 16:372–380.
- Schluter, D. 2009. Evidence for Ecological Speciation and Its Alternative. *Science* 323:737–741.
- Scopece, G., C. Lexer, A. Widmer, and S. Cozzolino. 2010. Polymorphism of postmating reproductive isolation within plant species. *Taxon* 59:1367–1374.
- Servedio, M. R., and J. Hermisson. 2019. The evolution of partial reproductive isolation as an adaptive optimum. *Evolution* 74:4–14.
- Shoemaker, D. D., V. Katju, and J. Jaenike. 1999. *Wolbachia* and the evolution of reproductive isolation between *Drosophila recens* and *Drosophila subquinaria*. *Evolution* 53:1157–1164.
- Smith, J. W. 1975. Spider Mites: Population Suppression by Interspecific Hybridization. *Environ. Entomol.* 4:588–590.
- Sousa, V. C., F. Zélé, L. R. Rodrigues, D. P. Godinho, M. Charlery de la Masselière, and S. Magalhães. 2019. Rapid host-plant adaptation in the herbivorous spider mite *Tetranychus urticae* occurs at low cost. *Curr. Opin. Insect Sci.* 36:82–89.
- Sugasawa, J., Y. Kitashima, and T. Gotoh. 2002. Hybrid affinities between the green and the red forms of the two-spotted spider mite *Tetranychus urticae* (Acari : Tetranychidae) under laboratory and semi-natural conditions. *Sci. Technol.* 37:127–139.
- Suh, E., C. Sim, J. J. Park, and K. Cho. 2015. Inter-population variation for *Wolbachia* induced reproductive incompatibility in the haplodiploid mite *Tetranychus urticae*. *Exp. Appl. Acarol.* 65:55–71.
- Supple, M. A., R. Papa, H. M. Hines, W. O. McMillan, and B. A. Counterman. 2015. Divergence with gene flow across a speciation continuum of *Heliconius* butterflies. *BMC Evol. Biol.* 15:204.
- Takafuji, A., and H. Fujimoto. 1985. Reproductive compatibility between populations of the citrus red mite, *Panonychus citri* (McGregor) (Acarina: Tetranychidae). *Res. Popul. Ecol.* 27:361–372.
- Telschow, A., P. Hammerstein, and J. H. Werren. 2005. The effect of *Wolbachia* versus genetic incompatibilities on reinforcement and speciation. *Evolution* 59:1607–1619.
- Tram, U., K. Fredrick, J. H. Werren, and W. Sullivan. 2006. Paternal chromosome segregation during the first mitotic division determines *Wolbachia*-induced cytoplasmic incompatibility phenotype. *J. Cell Sci.* 119:3655–3663.
- Turelli, M., N. H. Barton, and J. A. Coyne. 2001. Theory of Speciation. *Trends Ecol. Evol.* 16:330–343.
- Turelli, M., and L. C. Moyle. 2007. Asymmetric postmating isolation: Darwin’s corollary to Haldane’s rule. *Genetics* 176:1059–1088.
- Turelli, M., and H. A. Orr. 2000. Dominance, epistasis and the genetics of postzygotic isolation. *Genetics* 154:1663–1679.
- Vala, F., J. A. J. Breeuwer, and M. W. Sabelis. 2000. *Wolbachia*-induced “hybrid breakdown” in the two-spotted spider mite *Tetranychus urticae* Koch. *Proc. R. Soc. B Biol. Sci.* 267:1931–1937.
- Vala, F., M. Egas, J. A. J. Breeuwer, and M. W. Sabelis. 2004. *Wolbachia* affects oviposition and mating behaviour of its spider mite host. *J. Evol. Biol.* 17:692–700.

- Vala, F., A. Weeks, D. Claessen, J. A. J. Breeuwer, and M. W. Sabelis. 2002. Within- and between-population variation for *Wolbachia*-induced reproductive incompatibility in a haplodiploid mite. *Evolution* 56:1331–1339.
- Van de Bund, C. F., and W. Helle. 1960. Investigations on the *Tetranychus urticae* complex in north west Europe (Acari: Tetranychidae). *Entomol. Exp. Appl.* 3:142–156.
- Vavre, F., F. Dedeine, M. Quillon, P. Fouillet, F. Fleury, and M. Boulétreau. 2001. Within-species diversity of *Wolbachia*-induced Cytoplasmic Incompatibility in haplodiploid insects. *Evolution* 55:1710–1714.
- Vavre, F., F. Fleury, J. Varaldi, P. Fouillet, and M. Bouleatreau. 2000. Evidence for female mortality in *Wolbachia*-mediated cytoplasmic incompatibility in haplodiploid insects: Epidemiologic and evolutionary consequences. *Evolution* 54:191–200.
- Vavre, F., F. Fleury, J. Varaldi, P. Fouillet, and M. Boulétreau. 2002. Infection polymorphism and cytoplasmic incompatibility in Hymenoptera-*Wolbachia* associations. *Heredity* 88:361–365.
- Weeks, A. R., K. Tracy Reynolds, and A. A. Hoffmann. 2002. *Wolbachia* dynamics and host effects: What has (and has not) been demonstrated? *Trends Ecol. Evol.* 17:257–262.
- Weinert, L. A., E. V. Araujo-Jnr, M. Z. Ahmed, and J. J. Welch. 2015. The incidence of bacterial endosymbionts in terrestrial arthropods. *Proc. R. Soc. B Biol. Sci.* 282:20150249.
- Werren, J. H. 1998. *Wolbachia* and speciation. Pp. 245–260 in D. J. Howard and S. H. Berlocher, eds. *Endless forms: species and speciation*. Oxford University Press Inc, Oxford.
- Werren, J. H., L. Baldo, and M. E. Clark. 2008. *Wolbachia*: Master manipulators of invertebrate biology. *Nat. Rev. Microbiol.* 6:741–751.
- Xie, R.-R., X.-L. Chen, and X.-Y. Hong. 2010. Variable fitness and reproductive effects of *Wolbachia* infection in populations of the two-spotted spider mite *Tetranychus urticae* Koch in China. *Appl. Entomol. Zool.* 46:95–102.
- Yu, M. Z., K. J. Zhang, X. F. Xue, and X. Y. Hong. 2011. Effects of *Wolbachia* on mtDNA variation and evolution in natural populations of *Tetranychus urticae* Koch. *Insect Mol. Biol.* 20:311–321.
- Zeh, J. A., M. M. Bonilla, A. J. Adrian, S. Mesfin, and D. W. Zeh. 2012. From father to son: transgenerational effect of tetracycline on sperm viability. *Sci. Rep.* 2:375.
- Zélé, F., M. Altıntaş, I. Santos, I. Cakmak, and S. Magalhães. 2020a. Population-specific effect of *Wolbachia* on the cost of fungal infection in spider mites. *Ecol. Evol.* 10:3868–3880.
- Zélé, F., I. Santos, M. Matos, M. Weill, F. Vavre, and S. Magalhães. 2020b. Endosymbiont diversity in natural populations of *Tetranychus* mites is rapidly lost under laboratory conditions. *Heredity* 124:603–617.
- Zélé, F., I. Santos, I. Olivieri, M. Weill, O. Duron, and S. Magalhães. 2018a. Endosymbiont diversity and prevalence in herbivorous spider mite populations in South-Western Europe. *FEMS Microbiol. Ecol.* 94:fiy015.
- Zélé, F., M. Weill, and S. Magalhães. 2018b. Identification of spider-mite species and their endosymbionts using multiplex PCR. *Exp. Appl. Acarol.* 74:123–138.
- Zhang, Y.-K., Y.-T. Chen, K. Yang, G.-X. Qiao, and X.-Y. Hong. 2016. Screening of spider mites (Acari: Tetranychidae) for reproductive endosymbionts reveals links between co-infection and evolutionary history. *Sci. Rep.* 6:27900.
- Zhang, Y.-K., K.-J. Zhang, J.-T. Sun, X.-M. Yang, C. Ge, and X.-Y. Hong. 2013. Diversity of *Wolbachia* in Natural Populations of Spider Mites (genus *Tetranychus*): Evidence for Complex Infection History and Disequilibrium Distribution. *Microb. Ecol.* 65:731–739.
